# Supplementary material for: Amplification-free long-read sequencing reveals unforeseen CRISPR-Cas9 off-target activity
Source: PubMed Central journal article supplement (PMC7706270; doi:10.1186/s13059-020-02206-w), 2020-12-01
Supplement: 13059_2020_2206_MOESM1_ESM.pdf [file 13059_2020_2206_MOESM1_ESM.pdf]

# Supplementary Material

## Amplification-free long read sequencing reveals unforeseen CRISPR-Cas9 off-target activity in vitro

Ida Höjjer, Josefin Johansson, Sanna Gudmundsson, Chen-Shan Chin, Ignas Bunikis, Susana Häggqvist, Anastasia Emmanouilidou, Maria Wilbe, Marcel den Hoed, Marie-Louise Bondeson, Lars Feuk, Ulf Gyllensten, Adam Ameer

### Table of contents

|                                                       |    |
|-------------------------------------------------------|----|
| Supplementary Figures .....                           | 2  |
| Supplementary Tables.....                             | 5  |
| Supplementary Information .....                       | 11 |
| <i>De novo</i> assembly of PacBio HiFi data .....     | 11 |
| SV detection in long amplicon re-sequencing data..... | 11 |

## Supplementary Figures

Mapped CCS read statistics

| Value          | Analysis Metric                  |
|----------------|----------------------------------|
| 98.54%         | Mapped CCS Read Mean Concordance |
| 3,702,538      | Number of Alignments             |
| 3,562,153      | Number of CCS Reads (mapped)     |
| 55,717,061,882 | Number of CCS Bases (mapped)     |
| 15,048         | CCS Read Length Mean (mapped)    |
| 15,310         | CCS Read Length N50 (mapped)     |
| 20,480         | CCS Read Length 95% (mapped)     |
| 36,684         | CCS Read Length Max (mapped)     |

Mapped CCS read length

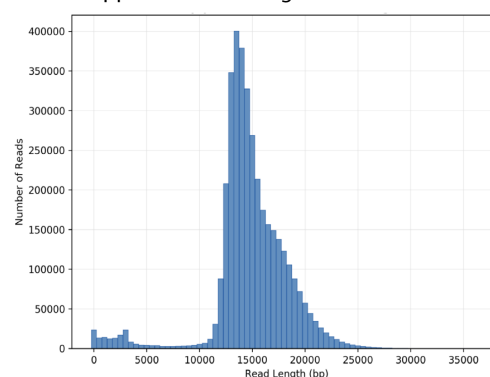

**Figure S1.** Throughput and alignment statistics for HiFi data for the HEK293 cell line used in this study. The HEK293 DNA was sequenced on two Sequel II SMRT cells, after which CCS analysis was performed. The panels show the results after alignment to the human GRCh38 reference.

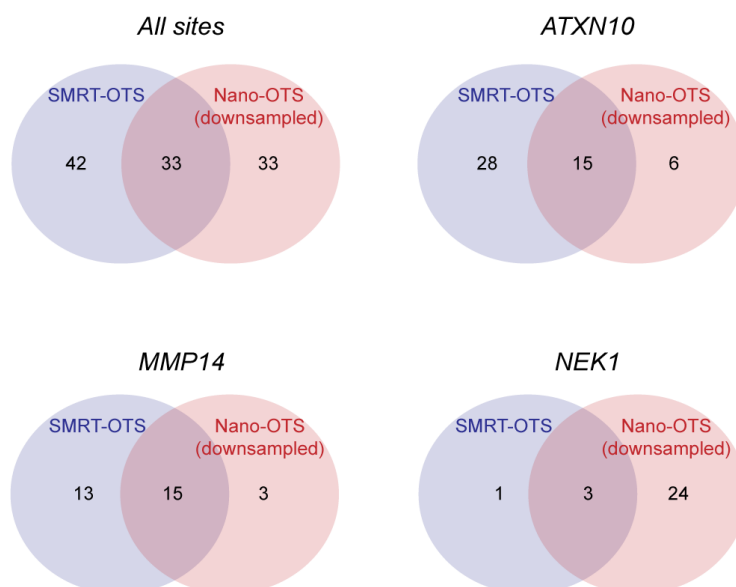

**Figure S2.** Venn diagrams showing the overlap between Cas9 cleavage sites predicted for SMRT-OTS and downsampled Nano-OTS data. The top left panel shows results for the three gRNAs (*ATXN10*, *MMP14* and *NEK1*) combined, and the three other panels show results for the individual gRNAs. In this comparison, the Nano-OTS data has been downsampled to the same number of reads as the SMRT-OTS data.

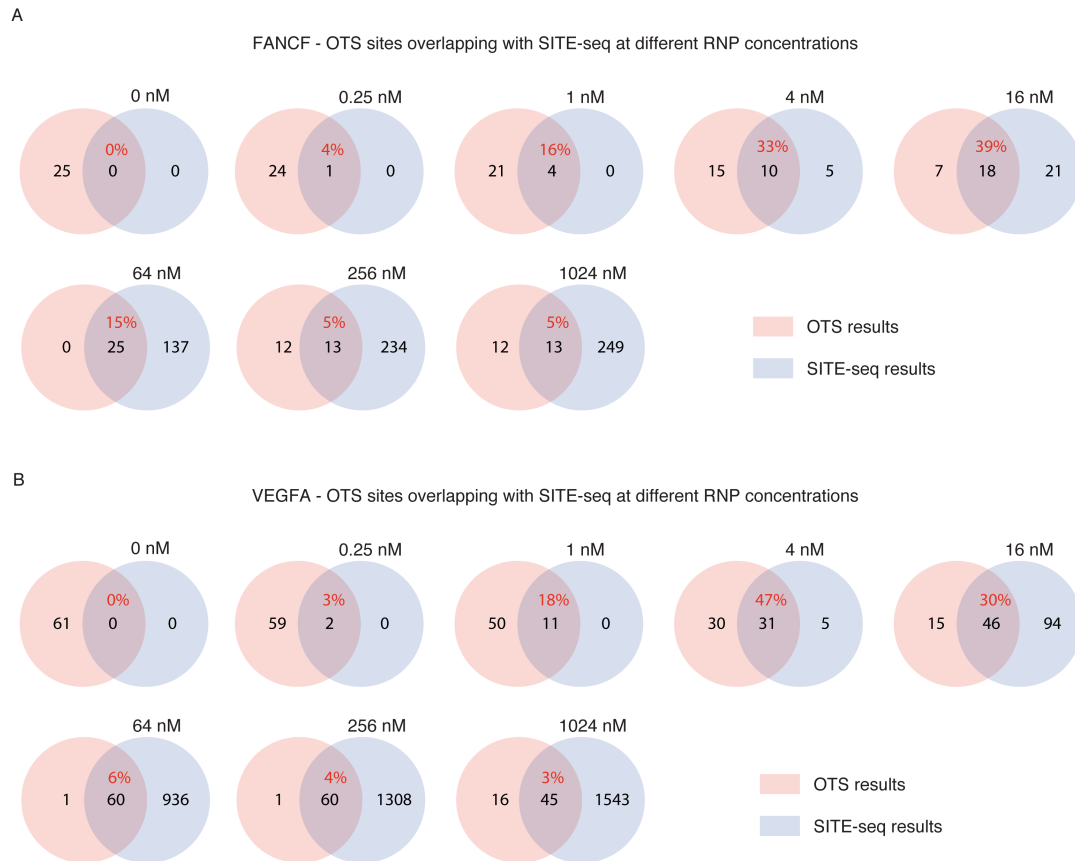

**Figure S3. Comparison of OTS to SITE-seq.** A) The Venn diagrams show the overlap between the 25 *FANCF* OTS sites and SITE-seq results using the same gRNA at different RNP concentrations. B) Overlap between the 61 *VEGFA* OTS sites and SITE-seq results using the same gRNA at different RNP concentrations.

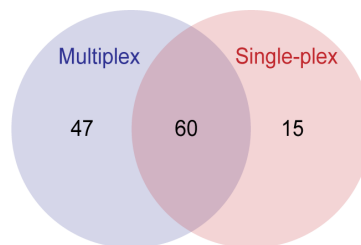

**Figure S4.** Comparison of Nano-OTS Cas9 cleavage sites detected for the gRNAs EMX1, FANCF, RNF2 and VEGFA in a multiplex run (left) and in a single-plex run (right). 60 Cas9 cleavage sites were detected in both runs.

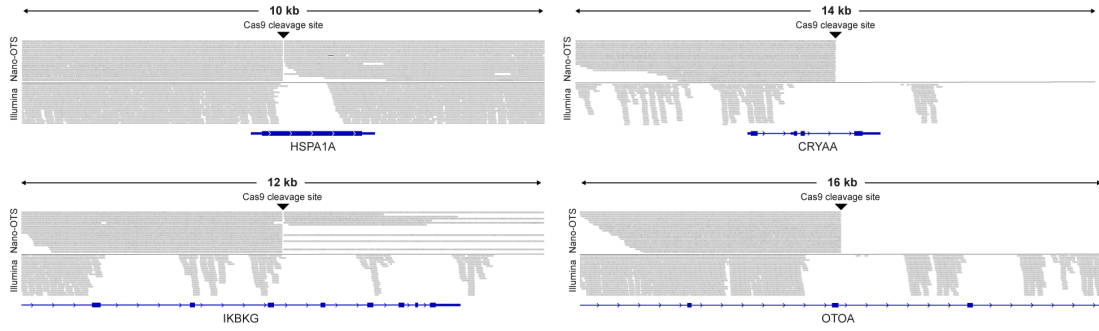

**Figure S5.** Four examples of “dark” genomic regions, *HSPA1A*, *CRYAA*, *IKBKG* and *OTOA* where Nano-OTS successfully identified an on-target site while short-read data failed to uniquely align. In each panel, the Nano-OTS reads are displayed at the top and at the bottom is data from one individual from the SweGen dataset.

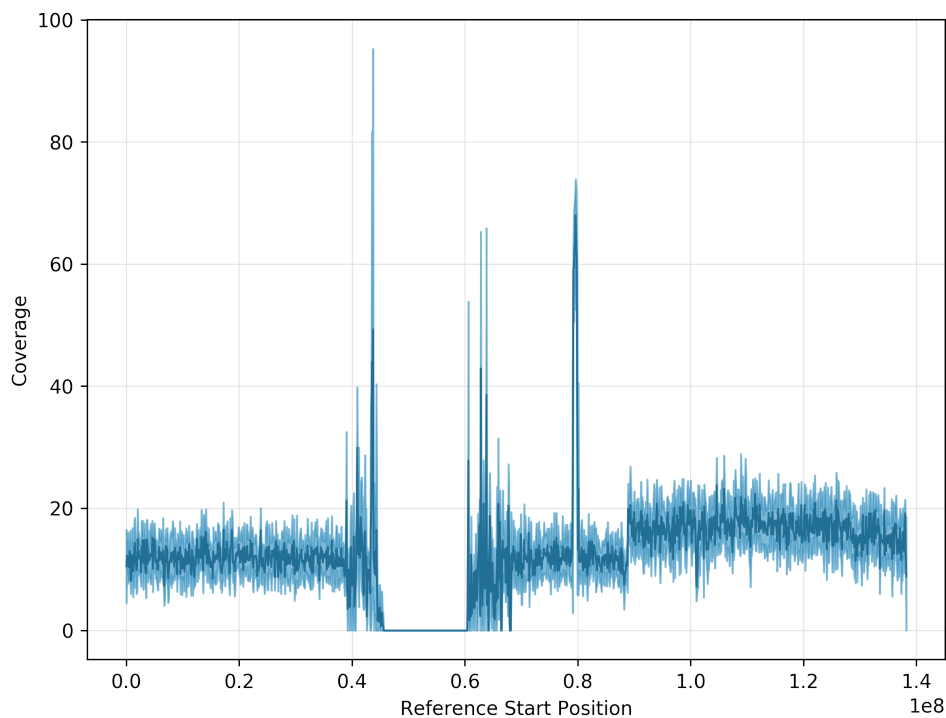

**Figure S6.** Coverage profile of HEK293 HiFi data on chromosome 9. The SNP rs7861875 (chr9:109,570,956) is located near coordinate 1.1 in a part of the chromosome that has elevated coverage as compared to the rest of the chromosome.

## Supplementary Tables

**Table S1.** Sequences and genomic coordinates for the gRNAs used in this study.

| Target             | Sequence             | Genomic coordinates (GRCh38) |
|--------------------|----------------------|------------------------------|
| ATXN10             | AUACAAAGGAUCAGAAUCCC | chr22:45794847-45794866      |
| MMP14              | GCGGUGCCGAGCGUGAGCAG | chr14:22836860-22836879      |
| NEK1               | AUAGUAAUGGAUUACUGUGA | chr4:169599161-169599180     |
| EMX1               | GAGUCCGAGCAGAAGAAGAA | chr2:72933853-72933872       |
| FANCF              | GGAAUCCCUUCUGCAGCACC | chr11:22625789-22625808      |
| RNF2               | GUCAUCUUAGUCAUUACCU  | chr1:185087638-185087657     |
| VEGFA <sup>a</sup> | GGGUGGGGGGAGUUUGCUC  | chr6:43769557-43769576       |
| CRYAA              | GGCUACGUGGGGGCUUUACC | chr21:43171532-43171551      |
| HSPA1A             | UGAUCACCGCGUUGGUCACC | chr6:31816170-31816189       |
| IKBK               | ACACGCAGUGAAACGUGGUC | chrX:154560786-154560805     |
| OPN1LW             | UACACUAUCGGGUAGUGCC  | chrX:154151838-154151857     |
| OTOA               | UAUGGGAAAACUGCUCGAGG | chr16:21740996-21741015      |
| STRC               | ACGGACGAUUGGGGAAUACC | chr15:43615531-43615550      |

<sup>a</sup>The VEGFA gRNA is also known by the names “VEGFA site 1” and “VEGFA1” from previous studies

**Table S2.** OTS sites found both by SMRT-OTS and Nano-OTS, but not detected by CHOPCHOP

| chr   | position  | gRNA   | DNA binding sequence      | mm | indels | SMRT | Nano |
|-------|-----------|--------|---------------------------|----|--------|------|------|
| chr1  | 199581904 | atxn10 | TAATAAAGGATCAGAATACCAGG   | 4  | 0      | 45   | 558  |
| chr7  | 132754767 | atxn10 | ATAC-TAGGATCAAAATCCCAGG   | 2  | 1      | 35   | 276  |
| chr2  | 13854278  | atxn10 | CCAGGGATTCTGATCCATGTCCAT  | 3  | 1      | 17   | 25   |
| chr7  | 146700912 | atxn10 | CAACAAAGGATAAGAATCCCAAG   | 4  | 0      | 14   | 30   |
| chr2  | 30757626  | atxn10 | ATGCTCAGGATCAGAATCCCATG   | 4  | 0      | 12   | 31   |
| chr5  | 60703887  | atxn10 | CATGGGATTCTGATCCTCT-TCT   | 3  | 1      | 10   | 41   |
| chr10 | 104676047 | atxn10 | CCAGGGA-TCTGATGCTTTGTGA   | 3  | 1      | 9    | 38   |
| chr2  | 14708587  | atxn10 | CCAGGGATTCTGTTCTGAGTGT    | 4  | 0      | 8    | 19   |
| chr8  | 23569322  | atxn10 | ACCTACTGGATCAGAATCCCTGG   | 5  | 0      | 8    | 17   |
| chr20 | 17814888  | atxn10 | TTAGCATGGATCAGAATCCCAGG   | 4  | 0      | 7    | 7    |
| chr2  | 216830092 | atxn10 | ACCTACAGAATCAGAATCCCTGG   | 5  | 0      | 7    | 11   |
| chr15 | 73766400  | atxn10 | ATCCAAAGGATACAGAATCCCAGG  | 1  | 1      | 6    | 30   |
| chr8  | 135042874 | atxn10 | CCAGGGA-TCTGATCCTCTGCAG   | 3  | 1      | 5    | 8    |
| chr5  | 139887571 | mmp14  | GCAGTGCCAAGCATGAGTAGTGG   | 4  | 0      | 75   | 115  |
| chrX  | 75180043  | mmp14  | GAGGTGCCAAGAGTGAGCAAGGG   | 4  | 0      | 50   | 75   |
| chr2  | 1759836   | mmp14  | GAGGTGCTGAGAGTGAGCAAGGG   | 4  | 0      | 49   | 201  |
| chr3  | 106643626 | mmp14  | CCCTTGCTCACTCTTGGCACCTC   | 4  | 0      | 39   | 66   |
| chr1  | 26500687  | mmp14  | CCCCTGCTCAGGCTCGGCTCAAC   | 4  | 0      | 26   | 204  |
| chr7  | 50393714  | mmp14  | CCTGTGCTGAGCGTAAGCAGTGG   | 4  | 0      | 17   | 13   |
| chr13 | 27212020  | mmp14  | CCCTTGCTCACTCTTGGCACCTC   | 4  | 0      | 16   | 26   |
| chr10 | 5943738   | mmp14  | CCCCTGCTCATGTTCCGGTGCCTC  | 5  | 0      | 11   | 85   |
| chr13 | 54676451  | mmp14  | CCCTTGCTCACTCTCGGCGCCGA   | 4  | 0      | 9    | 22   |
| chr2  | 72638487  | mmp14  | AAGGTACCAGAGTGAACAGAGG    | 5  | 0      | 9    | 43   |
| chr20 | 1178970   | nek1   | CCATCACAGTAATCCATATGACT   | 5  | 0      | 16   | 346  |
| chr8  | 135438302 | nek1   | CCTTCACAGTAATCCAATGAAGTAT | 2  | 2      | 5    | 25   |

**Table S3.** Four OTS-sites with >1% genome editing both from the Digenome-seq and CIRCLE-seq study

| chr   | pos       | sequence                | Digenome-seq (% edited) <sup>a</sup> | CIRCLE-seq (% edited) <sup>b</sup> | target           |
|-------|-----------|-------------------------|--------------------------------------|------------------------------------|------------------|
| chr8  | 127789014 | GAGTCcTAGCAGgAGAAGAAGAG | 6.67 (HeLa)                          | 1.30 (K562)                        | EMX1 off-target  |
| chr2  | 218980351 | GAGgCCGAGCAGAAGAAgACGG  | 6.38 (HeLa)                          | 2.94 (K562)                        | EMX1 off-target  |
| chr15 | 65345199  | GGaTGGaGGGAGTTTGCTCCTGG | 25.28 (HeLa)                         | 9.86 (U2OS)                        | VEGFA off-target |
| chr12 | 1878911   | cGGgGGaGGGAGTTTGCTCCTGG | 11.73 (HeLa)                         | 2.60 (U2OS)                        | VEGFA off-target |

<sup>a</sup> HeLa cells were used for genome editing in the Digenome-seq study

<sup>b</sup> K562 and U2OS cells were used for genome editing in the CIRCLE-seq study

**Table S4.** Identified on- and off-targets for a Nano-OTS with six gRNAs designed in six “dark” genic regions: *CRYAA*, *HSPA1A*, *IKBKG*, *OPN1LW*, *OTOA*, and *STRC*.

| chromosome | start     | end       | gRNA   | on/off-target | in dark region <sup>a</sup> |
|------------|-----------|-----------|--------|---------------|-----------------------------|
| chr21      | 6563217   | 6563217   | CRYAA  | off-target    | yes                         |
| chr21      | 43171533  | 43171533  | CRYAA  | on-target     | yes                         |
| chrX       | 79689123  | 79689123  | CRYAA  | off-target    | no                          |
| chr1       | 25413070  | 25413070  | CRYAA  | off-target    | no                          |
| chr2       | 60220583  | 60220583  | CRYAA  | off-target    | no                          |
| chr10      | 128399880 | 128399880 | CRYAA  | off-target    | no                          |
| chrX       | 83128564  | 83128564  | CRYAA  | off-target    | no                          |
| chr1       | 49353600  | 49353600  | CRYAA  | off-target    | no                          |
| chr10      | 121130357 | 121130357 | CRYAA  | off-target    | no                          |
| chrX       | 107482006 | 107482006 | CRYAA  | off-target    | no                          |
| chr1       | 223039522 | 223039522 | CRYAA  | off-target    | no                          |
| chr3       | 127921470 | 127921470 | CRYAA  | off-target    | no                          |
| chr6       | 31816171  | 31816171  | HSPA1A | on-target     | yes                         |
| chr6       | 31828353  | 31828366  | HSPA1A | off-target    | yes                         |
| chr21      | 46567455  | 46567455  | HSPA1A | off-target    | no                          |
| chr17      | 30212855  | 30212855  | HSPA1A | off-target    | no                          |
| chrX       | 154643649 | 154643649 | IKBKG  | off-target    | yes                         |
| chrX       | 154560788 | 154560788 | IKBKG  | on-target     | yes                         |
| chrX       | 154188955 | 154188955 | OPN1LW | off-target    | no                          |
| chrX       | 154226093 | 154226093 | OPN1LW | off-target    | yes                         |
| chrX       | 154263897 | 154263897 | OPN1LW | off-target    | yes                         |
| chrX       | 154151841 | 154151841 | OPN1LW | on-target     | yes                         |
| chr7       | 17319262  | 17319262  | OPN1LW | off-target    | no                          |
| chr16      | 21740996  | 21740996  | OTOA   | on-target     | yes                         |
| chr16      | 22557118  | 22557118  | OTOA   | off-target    | yes                         |
| chr2       | 137384792 | 137384799 | OTOA   | off-target    | no                          |
| chr3       | 177404425 | 177404425 | OTOA   | off-target    | no                          |
| chr15      | 43615532  | 43615532  | STRC   | on-target     | yes                         |
| chr15      | 43714994  | 43714994  | STRC   | off-target    | yes                         |
| chr10      | 128550395 | 128550395 | STRC   | off-target    | no                          |

<sup>a</sup> The value in this column is “yes” if the target site overlaps with dark regions from the study by Ebberly et al, 2019: Ebberly, M.T.W., Jensen, T.D., Jansen-West, K. *et al.* Systematic analysis of dark and camouflaged genes reveals disease-relevant genes hiding in plain sight. *Genome Biol*20, 97 (2019). <https://doi.org/10.1186/s13059-019-1707-2>. Overlap was calculated using BEDTools using default settings.

**Table S5.** Results of *de novo* assembly of HEK293 HiFi data

|                   | <b>HEK293 <i>de novo</i> assembly statistics</b> |
|-------------------|--------------------------------------------------|
| Total contigs     | 2,110                                            |
| Total bases       | 2,896,467,641                                    |
| Max contig length | 47,094,793                                       |
| N50               | 11,221,406                                       |
| N90               | 1,874,419                                        |
| N95               | 724,820                                          |

**Table S6.** Unique reads supporting large insertion/deletion events (>50bp) at *MMP14* and *NEK1* on-target sites in CRISPR-Cas9 edited fibroblast cells

| On-target    | Large insertion/deletion variant                                     | SMRT cell and read ID             |
|--------------|----------------------------------------------------------------------|-----------------------------------|
| <i>MMP14</i> | DEL 623                                                              | m54259_200128_194006/72679552/ccs |
| <i>MMP14</i> | DEL 287                                                              | m54259_200128_194006/31719500/ccs |
| <i>MMP14</i> | INS 293<br>CGTTGGGCAGGTTCTTATCGAAGTT...GGGATGC<br>GGAAGGTCAGGATCTTCT | m54259_200128_194006/57737325/ccs |
| <i>MMP14</i> | DEL 87                                                               | m54259_200128_194006/61669573/ccs |
| <i>MMP14</i> | DEL 103                                                              | m54259_200128_194006/25428036/ccs |
| <i>MMP14</i> | DEL 261                                                              | m54259_200128_194006/25952997/ccs |
| <i>MMP14</i> | DEL 61                                                               | m54259_200128_194006/28509175/ccs |
| <i>MMP14</i> | INS 382<br>AGGGGATGCGGAAGGTCAGGATCTT...TTTGTAC<br>TTCTCAGGCAGCTGCTGC | m54259_200128_194006/19137446/ccs |
| <i>MMP14</i> | INS 75<br>GCTGTGCTTTCTTTAAAGTTTCAA...GTATCTGA<br>AGATGAATGTTTTGAGT   | m54259_200128_194006/17826396/ccs |
| <i>MMP14</i> | DEL 122                                                              | m54259_200128_194006/15598537/ccs |
| <i>MMP14</i> | INS 591<br>AGCGGGGCGGGGCGGGGCGAGGGGC...GTGAT<br>CACCGACGAGTACAAGGTGC | m54259_200128_194006/53936325/ccs |
| <i>MMP14</i> | INS 98<br>GAACTTCAGGGTCAGCTTGCCGTAG...ACGTCGC<br>CGTCCAGCTCGACCAGGA  | m54259_200128_194006/26345740/ccs |
| <i>MMP14</i> | INS 324<br>TGAGGGGATGCGGAAGGTCAGGATC...AAATCTC<br>TTTGTACTTCTCAGGCAG | m54259_200128_194006/22086087/ccs |
| <i>MMP14</i> | DEL 371                                                              | m54259_200128_194006/25232004/ccs |
| <i>MMP14</i> | INS 247<br>AGATTATCAAAAAGGATCTTCACT...GCAATGAT<br>ACCGCGCTTCCACGCT   | m54259_200128_194006/37749032/ccs |
| <i>MMP14</i> | DEL 122                                                              | m54259_200128_194006/20775878/ccs |
| <i>MMP14</i> | INS 198<br>TGTCTCAACAGCGGTAAGATCCTTG...CAGTCACA<br>GAAAAGCATCTTACGGA | m54259_200128_194006/10813796/ccs |
| <i>NEK1</i>  | DEL 69                                                               | m54259_200129_161744/10814348/ccs |
| <i>NEK1</i>  | DEL 65                                                               | m54259_200129_161744/56099349/ccs |
| <i>NEK1</i>  | INS 262<br>TGGCCGACAAGCAGAAGAACGGCAT...GGCATG<br>GACGAGCTGTACAAGGAAT | m54259_200129_161744/73597357/ccs |
| <i>NEK1</i>  | INS 333<br>AGCCCTTGTCACCACTTCTCGAA...ATCTTTTC<br>CAGGATGGGCTTGATGA   | m54259_200129_161744/42468304/ccs |

<sup>a</sup> 17 of 5233 reads (0.324%) contained a large insertion/deletion at the *MMP14* on-target in edited cells. 0 of 18538 reads contained a large insertion/deletion at the *MMP14* on-target in control DNA

<sup>b</sup> 4 of 10404 reads (0.038%) contained a large insertion/deletion at the *NEK1* on-target in edited cells. 0 of 12998 reads contained a large insertion/deletion at the *NEK1* on-target in control DNA



**Table S7.** Number of insertion/deletion events identified at on- and off-target sites for *MMP14* in CRISPR-Cas9 edited fibroblast cells and in unedited control cells

|            |                 | Insertion/deletion events in edited <i>MMP14</i> fibroblast cells <sup>a</sup> | Insertion/deletion events in control (unedited) fibroblast cells <sup>b</sup> |
|------------|-----------------|--------------------------------------------------------------------------------|-------------------------------------------------------------------------------|
| On-target  | chr14:22836862  | 302 indels in 5310 reads (5.69%)                                               | 76 indels in 8095 reads (0.94%)                                               |
| Off-target | chr10:30769946  | 31 indels in 3484 reads (0.90%)                                                | 109 indels in 7214 reads (1.51%)                                              |
| Off-target | chr11:115160826 | 259 indels in 4457 reads (5.81%)                                               | 452 indels in 7968 reads (5.67%)                                              |
| Off-target | chr3:166423833  | 35 indels in 1950 reads (1.79%)                                                | 131 indels in 7995 reads (1.63%)                                              |
| Off-target | chr4:67287221   | 43 indels in 8057 reads (0.53%)                                                | 99 indels in 8117 reads (1.22%)                                               |
| Off-target | chr5:50292712   | 94 indels in 7206 reads (1.30%)                                                | 115 indels in 7088 reads (1.62%)                                              |
| Off-target | chr7:116998522  | 33 indels in 4460 reads (0.73%)                                                | 127 indels in 8023 reads (1.58%)                                              |
| Off-target | chr5:139887571  | 16 indels in 7265 reads (0.21%)                                                | 43 indels in 7741 reads (0.55%)                                               |
| Off-target | chr5:168537900  | 1 indels in 1037 reads (0.10%)                                                 | 23 indels in 1625 reads (1.42%)                                               |
| Off-target | chr6:67722906   | 21 indels in 7617 reads (0.28%)                                                | 66 indels in 7053 reads (0.94%)                                               |
| Off-target | chr2:1759836    | 4 indels in 1521 reads (0.26%)                                                 | 6 indels in 1797 reads (0.33%)                                                |
| Off-target | chr7: 50393714  | 21 indels in 8033 reads (0.26%)                                                | 143 indels in 8088 reads (1.77%)                                              |
| Off-target | chr21:22597662  | 28 indels in 8133 reads (0.34%)                                                | 74 indels in 8119 reads (0.91%)                                               |
| Off-target | chr19:19626751  | 29 indels in 6736 reads (0.43%)                                                | 78 indels in 5318 reads (1.47%)                                               |
| Off-target | chrX:75180043   | 25 indels in 8398 reads (0.30%)                                                | 23 indels in 8193 reads (0.28%)                                               |
| Off-target | chr3:106643626  | 35 indels in 7911 reads (0.44%)                                                | 36 indels in 7789 reads (0.46%)                                               |

<sup>a,b</sup> The events correspond to all SMRT re-sequencing reads having an insertion or deletion start coordinate within a +/-20bp window surrounding the Cas9 cleavage site

**Table S8.** Number of insertion/deletion events identified at on- and off-target sites for *NEK1* in CRISPR-Cas9 edited fibroblast cells and in unedited control cells

|            |                | Insertion/deletion events in edited <i>NEK1</i> fibroblast cells <sup>a</sup> | Insertion/deletion events in control (unedited) fibroblast cells <sup>b</sup> |
|------------|----------------|-------------------------------------------------------------------------------|-------------------------------------------------------------------------------|
| On-target  | chr4:169599163 | 721 indels in 8008 reads (9.00%)                                              | 21 indels in 8056 reads (0.26%)                                               |
| Off-target | chr20:1178970  | 15 indels in 7914 reads (0.19%)                                               | 21 indels in 7982 reads (0.26%)                                               |
| Off-target | chr8:122196851 | 0 indels in 386 reads (0%)                                                    | 1 indels in 632 reads (0.16%)                                                 |
| Off-target | chr8:135438302 | 16 indels in 5751 reads (0.28%)                                               | 24 indels in 7757 reads (0.31%)                                               |

<sup>a,b</sup> The events correspond to all SMRT re-sequencing reads having an insertion or deletion start coordinate within a +/-20bp window surrounding the Cas9 cleavage site

**Table S9.** Primer information for *MMP14* on- and off-target sites

| On/off-target | Genomic coordinates (GRCh38) | Forward primer          | Reverse primer         | Amplicon length (bp) |
|---------------|------------------------------|-------------------------|------------------------|----------------------|
| On-target     | chr14:22836862               | CAGGACAGGAACCACTAGTAGA  | CAGAACGACAGAAGGAAGATGG | 5146                 |
| Off-target    | chr10:30769946               | GGCTTGACACCGAGATTAG     | GAAGGGATGAAGCAGGAAGAG  | 5290                 |
| Off-target    | chr11:115160826              | GCACCTACCTTGTCTTATT     | AAGGAGAGGGTGTGGTTTATG  | 5332                 |
| Off-target    | chr3:166423833               | TGTCTGGCTCGGGCTATT      | GGCTCTGTCCATCCCTTAC    | 5468                 |
| Off-target    | chr4:67287221                | TTCGTGCCTGTCCACATTAG    | GTTAGCAGCGGTGTATCTGTAT | 5049                 |
| Off-target    | chr5:50292712                | CATCGGGACATGACAATGATCTA | AGCAAAGCCTGCAAGAAATATG | 5287                 |
| Off-target    | chr7:116998522               | CTGTGAGGGAATGTGGGTTATC  | CTCCTGCTTCTCCCTTCATC   | 5434                 |
| Off-target    | chr5:139887571               | CAGGGAGGCCAGATAAGAATTG  | GCCATCATCCAAGAGGTAAG   | 5008                 |
| Off-target    | chr5:168537900               | GACAAGGAACAGACAGAGGAAG  | TTGGGAACAGAGAATCCAAGAG | 4624                 |
| Off-target    | chr6:67722906                | CATCCATCGACACAAGCTACA   | GAGGAAGCATAGCTGGAATAC  | 5070                 |
| Off-target    | chr2:1759836                 | CTTGGTCCAACACCCTCA      | CCTCAGCAAAGGCTGGGTAT   | 8682                 |
| Off-target    | chr7: 50393714               | CAGAAGACTGTGCAAGATAGG   | TAGTGGGAAGAAGGCTGAAATG | 4924                 |
| Off-target    | chr21:22597662               | AAGCCAGGTGTCAAGAATAG    | TAGCCCTCCAAGAATAAAC    | 5074                 |
| Off-target    | chr19:19626751               | CACAGGGCTTACCAAGGATAC   | GATCCGGTCTGCATAATCAA   | 5012                 |
| Off-target    | chrX:75180043                | GGTCGGATTAGTGGTCTTAC    | CATCCACGCTCACAGATAAGA  | 4128                 |
| Off-target    | chr3:106643626               | GCAGTGTGGTGGGCTAAATA    | GCTCTGTGACTAGGTGCATATC | 5308                 |

**Table S10.** Primer information for *NEK1* on- and off-target sites

| <b>On/off-target</b> | <b>Genomic coordinates (GRCh38)</b> | <b>Forward primer</b>  | <b>Reverse primer</b>  | <b>Amplicon length (bp)</b> |
|----------------------|-------------------------------------|------------------------|------------------------|-----------------------------|
| On-target            | chr4:169599163                      | CTGTCCAAGGGAACGACTTAG  | CTCCCAACTGTGCCTGTATAAT | 5237                        |
| Off-target           | chr20:1178970                       | CCCATCCTGTGGCTTCTTAAT  | GGACCTCTGCTGCCTTATTG   | 4486                        |
| Off-target           | chr8:122196851                      | GCCCTGTAGCAGTGAGATAC   | CTCTCTAGAAACCCGCAAAGAG | 4642                        |
| Off-target           | chr8:135438302                      | GGGTGTAGGGCAACTTGATTAG | GCAGCTCCAAGTGTGAAAGA   | 5200                        |

## Supplementary Information

### *De novo* assembly of PacBio HiFi data

SMRTcell data was assembled with Peregrine build 0.1.6.0 docker image with the following command options on an AWS r5d.12xlarge instance:

```
docker run -it -v /wd:/wd --user $(id -u):$(id -g) cschin/peregrine:0.1.6.0 asm /wd/seqdata.lst 24 24 24 24 24 24 24 24 24 --with-consensus --shimmer-r 3 --best_n_ovlp 8 --output /wd/asm
```

The file /wd/seqdata.lst contains the file path to the input file:

```
/wd/data/m64077_191107_133924.Q20.fasta.gz /wd/data/m64077_191108_195203.Q20.fasta.gz
```

### SV detection in long amplicon re-sequencing data

The software SVIM (v 1.4.0) was used for detection of large structural variants in the SMRT amplicon CCS data, with following parameters:

```
svim alignment --partition_max_distance 1 --insertion_sequences - --types DEL,INS,INV --heterozygous_threshold 0.000001 --read_names --min_sv_size 50 [CCS bamfile] [hg38 reference file]
```
